# Supplementary material
Source: PubMed Central journal article supplement (PMC6719699)
Supplement: NIHMS1047287-supplement-supplement.pdf [file NIHMS1047287-supplement-supplement.pdf]

# Assessment of respirator fit capability test criteria for full-facepiece air-purifying systems

## Supplemental Data Tables: CHI-SQUARE RESULTS

**Table 1.** Panel Passing Rates for Three Different Test Criteria Using  $\geq 500$  as the Passing Fit Factor Level

|                   | Criterion 1<br>PPR (%)* | Criterion 2<br>PPR (%) | Criterion 3<br>PPR (%) |
|-------------------|-------------------------|------------------------|------------------------|
| Family            |                         |                        |                        |
| Three-size family | 100                     | 96                     | 96                     |
| Two-size family   | 79                      | 76                     | 63                     |
| One-size family   | 88                      | 64                     | 54                     |
| <b>P value**</b>  | 0.07                    | <b>0.02</b>            | <b>&lt;0.01</b>        |

\*Panel Passing Rate

\*\* P values in bold font indicate statistical significance (P value <0.5)

Table 2: Panel Passing Rates for Three Different Test Criteria Using  $\geq 1000$  as the Passing Fit Factor Level

|                   | Criterion 1<br>PPR (%)* | Criterion 2<br>PPR (%) | Criterion 3<br>PPR (%) |
|-------------------|-------------------------|------------------------|------------------------|
| <b>Family</b>     |                         |                        |                        |
| Three-size family | 96                      | 96                     | 92                     |
| Two-size family   | 75                      | 72                     | 38                     |
| One-size family   | 79                      | 52                     | 38                     |
| <b>P value**</b>  | 0.12                    | <b>&lt;0.01</b>        | <b>&lt;0.01</b>        |

\*Panel Passing Rate

\*\* P values in bold font indicate statistical significance (P value <0.5)

Table 3: Panel Passing Rates for Three Different Test Criteria Using  $\geq 2000$  as the Passing Fit Factor Level

|                   | Criterion 1<br>PPR (%)* | Criterion 2<br>PPR (%) | Criterion 3<br>PPR (%) |
|-------------------|-------------------------|------------------------|------------------------|
| <b>Family</b>     |                         |                        |                        |
| Three-size family | 96                      | 92                     | 92                     |
| Two-size family   | 63                      | 60                     | 29                     |
| One-size family   | 76                      | 52                     | 33                     |
| <b>P value**</b>  | <b>0.02</b>             | <b>&lt;0.01</b>        | <b>&lt;0.01</b>        |

\*Panel Passing Rate

\*\* P values in bold font indicate statistical significance (P value <0.5)
